# Supplementary material for: The effect of POPC acyl chains packing by aromatic amino acid methyl esters investigated by ATR-FTIR combined with QM calculations
Source: Royal Society of Chemistry journal article supplement (doi:10.1039/c6ra05903a), 2016-01-01
Supplement: c6ra05903a1.pdf [file c6ra05903a1.pdf]

## Supplementary Information

### The Effect of POPC Acyl Chains Packing by Aromatic Amino Acid Methyl Esters Investigated by ATR-FTIR Combined with QM Calculations

Bo Peng,<sup>a</sup> Xiao-Yan Ding,<sup>a</sup> Chao Sun,<sup>a</sup> Wei Liu,<sup>b</sup> John Z. H. Zhang,<sup>b,c</sup> Xin Zhao<sup>\*a</sup>

<sup>a</sup>Shanghai Key Laboratory of Magnetic Resonance, Department of Physics, School of Physics and Materials Science, East China Normal University, Shanghai 200062, P. R. China

<sup>b</sup>State Key Laboratory of Precision Spectroscopy, Department of Physics, School of Physics and Materials Science, East China Normal University, Shanghai 200062, P. R. China

<sup>c</sup>NYU-ECNU Center for Computational Chemistry at NYU Shanghai, Shanghai 200062, P. R. China

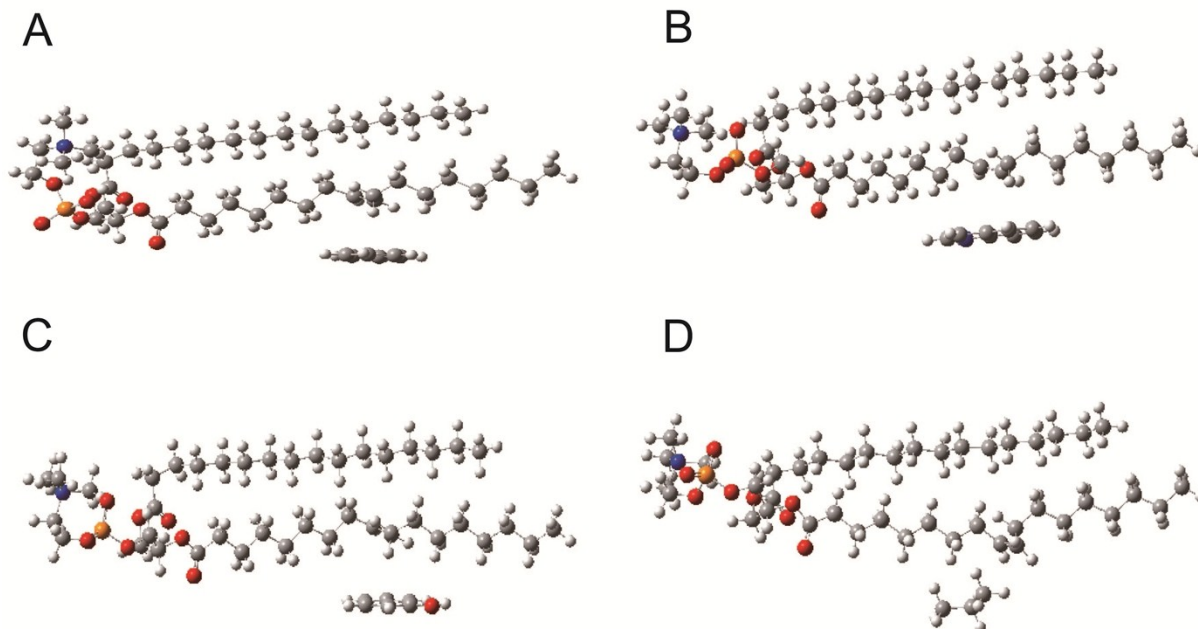

**Fig. S1.** Optimised geometries of study compounds determined by QM calculations at the  $\omega$ B97X-D/6-31G (d,p) level. (A) benzene with POPC, (B) indole with POPC, (C) phenol with POPC, (D) propane with POPC. C (grey), H (white), O (red), N (blue), P (orange).

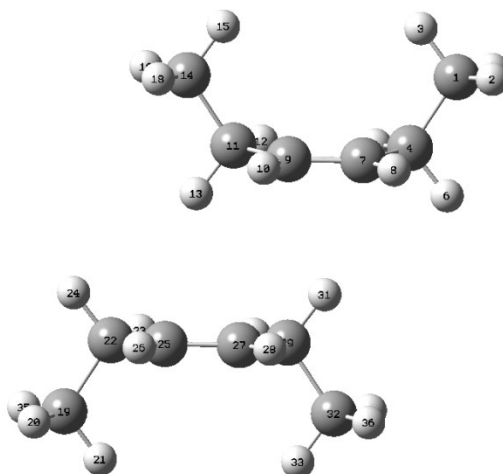

**Fig. S2.** Optimised geometry of 3-hexene with 3-hexene determined by QM calculations at the MP2/6-31G (d,p) level. C (grey), H (white).

**Table S1.** Important infrared group frequencies obtained by second derivative spectra of POPC bilayers and POPC bilayer–amino acid methyl ester complexes at a molar ratio of 10:1.

| Frequencies( $\text{cm}^{-1}$ ) |              |              |              |              | Assignments                    |
|---------------------------------|--------------|--------------|--------------|--------------|--------------------------------|
| POPC                            | POPC+Trp-OMe | POPC+Phe-OMe | POPC+Tyr-OMe | POPC+Leu-OMe |                                |
| 3010                            | 3007         | 3007         | 3008         | 3009         | $\nu(=\text{CH})$              |
| 2961                            | 2961         | 2961         | 2961         | 2961         | $\nu_{\text{as}}(\text{CH}_3)$ |
| 2919                            | 2921         | 2921         | 2922         | 2920         | $\nu_{\text{as}}(\text{CH}_2)$ |
| 2883                            | 2887         | 2886         | 2886         | 2885         | $\nu_{\text{s}}(\text{CH}_3)$  |

|      |      |      |      |      |                                              |
|------|------|------|------|------|----------------------------------------------|
| 2850 | 2852 | 2851 | 2852 | 2851 | $\nu_s(\text{CH}_2)$                         |
| 1735 | 1735 | 1735 | 1736 | 1735 | $\nu(\text{C=O}),\text{ester}$               |
| 1651 | 1646 | 1646 | 1646 | 1651 | $\nu(\text{C=C})$                            |
| 1465 | 1463 | 1464 | 1464 | 1465 | $\delta_{\text{as}}(\text{CH}_2)$            |
| 1375 | 1375 | 1375 | 1375 | 1375 | $\delta_s(^+\text{N}-\text{CH}_3)$           |
| 1241 | 1239 | 1240 | 1243 | 1241 | $\nu_{\text{as}}(\text{PO}_2^-)$             |
| 1172 | 1170 | 1170 | 1172 | 1171 | $\nu_{\text{as}}(\text{C-O-C}),\text{ester}$ |
| 1091 | 1090 | 1091 | 1093 | 1091 | $\nu_s(\text{PO}_2^-)$                       |
| 1055 | 1054 | 1054 | 1055 | 1054 | $\nu_s(\text{C-O-C}),\text{ester}$           |
| 968  | 967  | 967  | 967  | 967  | $\nu_{\text{as}}(\text{C-N}^+-\text{C})$     |
| 919  | 919  | 919  | 919  | 919  | $\nu_s(\text{C-N}^+-\text{C})$               |

**Table S2.** Geometry parameters for 3-hexene–3-hexene complexes in 3.27 Å.

| Atom symbol | x         | y         | z         |
|-------------|-----------|-----------|-----------|
| C           | -4.58372  | 0.718342  | -0.169711 |
| H           | -4.947923 | 1.107442  | 0.781095  |
| H           | -4.81931  | -0.344554 | -0.20722  |
| C           | -3.074791 | 0.935575  | -0.304061 |
| H           | -2.735609 | 0.55219   | -1.266235 |
| H           | -2.868061 | 2.009813  | -0.308085 |
| C           | -2.320124 | 0.294707  | 0.823052  |
| H           | -2.523506 | 0.711112  | 1.806423  |
| C           | -1.458464 | -0.735024 | 0.751598  |
| H           | -1.017012 | -1.084871 | 1.680597  |
| C           | -1.044939 | -1.501348 | -0.468427 |
| H           | -1.45655  | -1.050612 | -1.371585 |
| H           | 0.043098  | -1.449581 | -0.556468 |
| C           | -1.476265 | -2.967061 | -0.386014 |
| H           | -2.561539 | -3.045075 | -0.329132 |
| H           | -1.13804  | -3.527421 | -1.257485 |
| H           | -5.128416 | 1.219231  | -0.969784 |
| H           | -1.060508 | -3.44306  | 0.502192  |
| C           | 4.575579  | -0.729956 | -0.171621 |
| H           | 4.940212  | -1.11882  | 0.779115  |
| H           | 4.816424  | 0.331655  | -0.212047 |
| C           | 3.065241  | -0.939888 | -0.301714 |
| H           | 2.725583  | -0.556838 | -1.263864 |
| H           | 2.853114  | -2.013085 | -0.302931 |
| C           | 2.316585  | -0.292853 | 0.825887  |
| H           | 2.519932  | -0.708483 | 1.809592  |
| C           | 1.460283  | 0.74134   | 0.75438   |
| H           | 1.022989  | 1.095402  | 1.68377   |
| C           | 1.048401  | 1.507769  | -0.466136 |
| H           | 1.453649  | 1.051772  | -1.369532 |

|   |           |           |           |
|---|-----------|-----------|-----------|
| H | -0.040292 | 1.463898  | -0.550583 |
| C | 1.491041  | 2.9704    | -0.388779 |
| H | 2.577064  | 3.04032   | -0.335866 |
| H | 1.154004  | 3.531186  | -1.260434 |
| H | 5.115719  | -1.235327 | -0.971963 |
| H | 1.082022  | 3.451689  | 0.499701  |

**Table S3.** Geometry parameters for 3-hexene–3-hexene complexes in 3.47 Å.

| Atom symbol | x         | y         | z         |
|-------------|-----------|-----------|-----------|
| C           | 4.568627  | -0.760412 | -0.370868 |
| H           | 5.005768  | -1.166206 | 0.541443  |
| H           | 4.824732  | 0.297175  | -0.421593 |
| C           | 3.04914   | -0.942431 | -0.373596 |
| H           | 2.635596  | -0.543306 | -1.29955  |
| H           | 2.817907  | -2.011667 | -0.366544 |
| C           | 2.41135   | -0.294678 | 0.819851  |
| H           | 2.696108  | -0.719552 | 1.779047  |
| C           | 1.566708  | 0.751386  | 0.83104   |
| H           | 1.217753  | 1.103009  | 1.798372  |
| C           | 1.051344  | 1.527567  | -0.343377 |
| H           | 1.378974  | 1.079601  | -1.281586 |
| H           | -0.040466 | 1.480649  | -0.335479 |
| C           | 1.496541  | 2.990464  | -0.292189 |
| H           | 2.582982  | 3.062605  | -0.332145 |
| H           | 1.085053  | 3.557381  | -1.127118 |
| H           | 5.029163  | -1.266237 | -1.219227 |
| H           | 1.164526  | 3.463883  | 0.631913  |
| C           | -4.572441 | 0.751399  | -0.369934 |
| H           | -5.010302 | 1.156586  | 0.542301  |
| H           | -4.824076 | -0.307345 | -0.418897 |
| C           | -3.053749 | 0.9399    | -0.374614 |
| H           | -2.639536 | 0.541191  | -1.30045  |
| H           | -2.827082 | 2.010112  | -0.369319 |
| C           | -2.411891 | 0.296538  | 0.819029  |
| H           | -2.696346 | 0.722344  | 1.777895  |
| C           | -1.564114 | -0.74698  | 0.830776  |
| H           | -1.212506 | -1.095769 | 1.798167  |
| C           | -1.048591 | -1.524004 | -0.343014 |
| H           | -1.37682  | -1.077291 | -1.281612 |
| H           | 0.043164  | -1.476266 | -0.335373 |
| C           | -1.492664 | -2.9872   | -0.290107 |
| H           | -2.57906  | -3.060199 | -0.329752 |
| H           | -1.080908 | -3.554745 | -1.124481 |

|   |           |           |          |
|---|-----------|-----------|----------|
| H | -5.036082 | 1.254067  | -1.21848 |
| H | -1.16011  | -3.459312 | 0.63447  |

**Table S4.** Geometry parameters for 3-hexene–3-hexene complexes in 3.67 Å.

| Atom symbol | x         | y         | z         |
|-------------|-----------|-----------|-----------|
| C           | -4.523407 | 0.762328  | -0.619573 |
| H           | -5.056887 | 1.177244  | 0.235599  |
| H           | -4.77865  | -0.294259 | -0.691212 |
| C           | -3.012051 | 0.936598  | -0.454693 |
| H           | -2.500199 | 0.528744  | -1.326068 |
| H           | -2.776514 | 2.004632  | -0.429197 |
| C           | -2.514458 | 0.294629  | 0.806649  |
| H           | -2.905224 | 0.724971  | 1.725194  |
| C           | -1.678208 | -0.752249 | 0.918888  |
| H           | -1.44228  | -1.098702 | 1.921819  |
| C           | -1.031844 | -1.534132 | -0.185119 |
| H           | -1.260764 | -1.097534 | -1.157357 |
| H           | 0.052323  | -1.475235 | -0.061417 |
| C           | -1.467037 | -3.000749 | -0.167985 |
| H           | -2.542127 | -3.084108 | -0.324224 |
| H           | -0.962738 | -3.570643 | -0.948192 |
| H           | -4.883763 | 1.264103  | -1.517352 |
| H           | -1.232459 | -3.463112 | 0.790935  |
| C           | 4.532641  | -0.759789 | -0.610716 |
| H           | 5.057736  | -1.181994 | 0.246078  |
| H           | 4.791103  | 0.296622  | -0.672803 |
| C           | 3.019545  | -0.931446 | -0.460058 |
| H           | 2.516165  | -0.516478 | -1.332998 |
| H           | 2.781135  | -1.999044 | -0.443769 |
| C           | 2.512721  | -0.296732 | 0.801261  |
| H           | 2.899067  | -0.730528 | 1.720064  |
| C           | 1.672568  | 0.747     | 0.913614  |
| H           | 1.429108  | 1.087442  | 1.916799  |
| C           | 1.030283  | 1.532413  | -0.190242 |
| H           | 1.268188  | 1.103111  | -1.163563 |
| H           | -0.054452 | 1.46827   | -0.074461 |
| C           | 1.458488  | 3.000945  | -0.160991 |
| H           | 2.534228  | 3.09026   | -0.309246 |
| H           | 0.956932  | 3.57334   | -0.941134 |
| H           | 4.899517  | -1.256185 | -1.508839 |
| H           | 1.215102  | 3.456193  | 0.799134  |

**Table S5.** Geometry parameters for 3-hexene–3-hexene complexes in 3.87 Å.

| Atom symbol | x        | y         | z         |
|-------------|----------|-----------|-----------|
| C           | 4.536047 | -0.684306 | -0.802232 |
| H           | 5.152056 | -1.070357 | 0.010068  |
| H           | 4.748722 | 0.379153  | -0.90564  |

---

|   |           |           |           |
|---|-----------|-----------|-----------|
| C | 3.050554  | -0.906128 | -0.510185 |
| H | 2.453033  | -0.525791 | -1.338266 |
| H | 2.854612  | -1.980998 | -0.45639  |
| C | 2.638274  | -0.269932 | 0.78451   |
| H | 3.11171   | -0.684847 | 1.670654  |
| C | 1.787634  | 0.756076  | 0.959147  |
| H | 1.61909   | 1.098343  | 1.977007  |
| C | 1.02986   | 1.50961   | -0.092655 |
| H | 1.269565  | 1.133726  | -1.087741 |
| H | -0.039547 | 1.340393  | 0.057795  |
| C | 1.315861  | 3.010889  | -0.032299 |
| H | 2.371508  | 3.210031  | -0.214384 |
| H | 0.732806  | 3.552336  | -0.776939 |
| H | 4.837552  | -1.185895 | -1.721788 |
| H | 1.064422  | 3.413694  | 0.948923  |
| C | -4.55079  | 0.697782  | -0.785891 |
| H | -5.144191 | 1.116266  | 0.02702   |
| H | -4.790834 | -0.361927 | -0.862768 |
| C | -3.055766 | 0.88927   | -0.522517 |
| H | -2.482516 | 0.478786  | -1.353436 |
| H | -2.832408 | 1.959802  | -0.492233 |
| C | -2.637273 | 0.265305  | 0.77591   |
| H | -3.110967 | 0.684977  | 1.6597    |
| C | -1.777359 | -0.75209  | 0.957611  |
| H | -1.605272 | -1.085089 | 1.978033  |
| C | -1.014967 | -1.510188 | -0.087371 |
| H | -1.236422 | -1.128252 | -1.08428  |
| H | 0.054374  | -1.352955 | 0.078803  |
| C | -1.318814 | -3.008322 | -0.035084 |
| H | -2.374204 | -3.194279 | -0.231508 |
| H | -0.732382 | -3.554846 | -0.773357 |
| H | -4.855038 | 1.186392  | -1.711191 |
| H | -1.085232 | -3.41647  | 0.94826   |

---
